# Supplementary material for: Head patterning and Hox gene expression in an onychophoran and its implications for the arthropod head problem
Source: Springer Nature journal article supplement (doi:10.1007/s00427-010-0329-1), 2010-06-21
Supplement: 427_2010_329_MOESM1_ESM.pdf [file 427_2010_329_MOESM1_ESM.pdf]

## **Head patterning and Hox gene expression in an onychophoran and its implications for the arthropod head problem**

Bo Joakim Eriksson<sup>1,4,\*</sup>, Noel N. Tait<sup>2</sup>, Graham E. Budd<sup>3</sup>, Ralf Janssen<sup>3</sup>, Michael Akam<sup>1</sup>

1. University Museum of Zoology and Department of Zoology, Downing Street, Cambridge, CB2 3EJ, UK

2. Department of Biological Sciences, Macquarie University, Sydney 2109 NSW, Australia

3. Dept Earth Sciences, Paleobiology, Uppsala University, Villavägen 16, Uppsala, SE-752 36, Sweden.

4. Current Address: School of Biological and Chemical Sciences, Queen Mary, University of London, Mile End Road, London E1 4NS.

\* Corresponding: [j.eriksson@qmul.ac.uk](mailto:j.eriksson@qmul.ac.uk)  
peripatus@live.se

**Development Genes and evolution, supplementary data**

## Supplementary figures

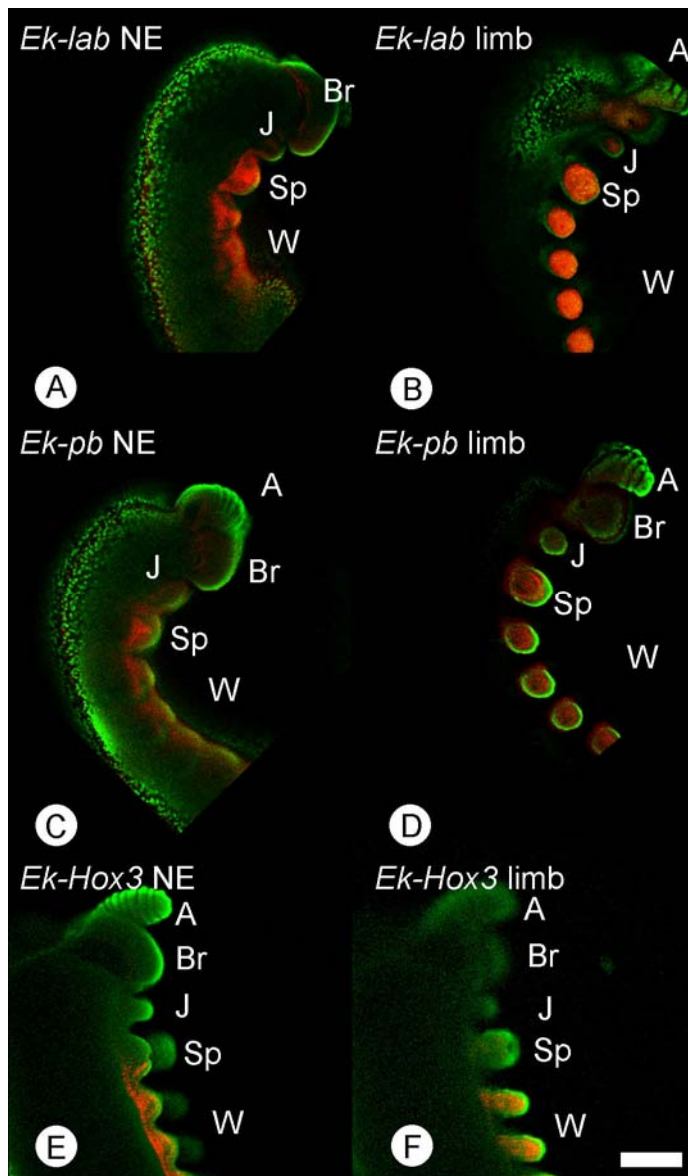

**S. 1** Optical sections from CLSM showing embryos of *Euperipatoides kanangrensis* at stage V stained for: *lab*, *pb* and *Hox3*. Lateral view, anterior is up. A, Section through the neuroectoderm showing *lab* expression in the mesoderm beneath as well as the basal and apical ectoderm of segments from the slime papilla (Sp) and continuing posteriorly. B, Same embryo as in A with a section through the limbs showing expression of *lab* in the mesoderm as well as basal and apical ectoderm of segments from the slime papilla and continuing posteriorly. C, Section through the neuroectoderm showing expression of *pb* in the mesoderm and basal ectoderm but lacking in the apical ectoderm of segments from the slime papilla and continuing posteriorly. D, Same embryo as in C with a section through the limbs showing expression of *pb* in the mesoderm and basal ectoderm but lacking in the apical ectodermal layer of segments from the slime papilla and continuing posteriorly. E, section through the neuroectoderm showing expression of *Hox3* in the mesoderm and basal ectoderm of the posterior half of the slime papilla segment and continuing posteriorly. F, Same embryo as in C with a section through the limbs showing expression of *Hox3* in the interior starting with the first walking (W) leg and continuing posteriorly. A = antenna, Br = brain rudiment, J = jaw, scale bar = 500  $\mu$ m.

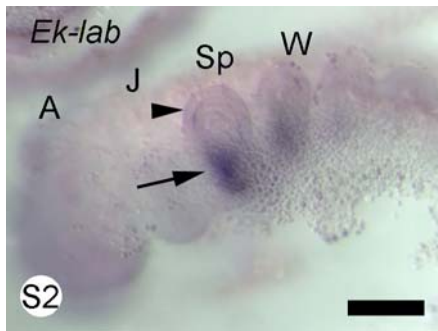

**S. 2** The anterior of a whole mount of *Euperipatoides kanangrensis* embryo at stage III stained for the presence of *lab* mRNA. Lateral view, anterior is to the left. Arrow points at the neuroectoderm of the slime papilla segment (Sp) and the arrowhead indicates the expression in the limb. A = antenna, W = walking leg, scale bar = 200  $\mu$ m.

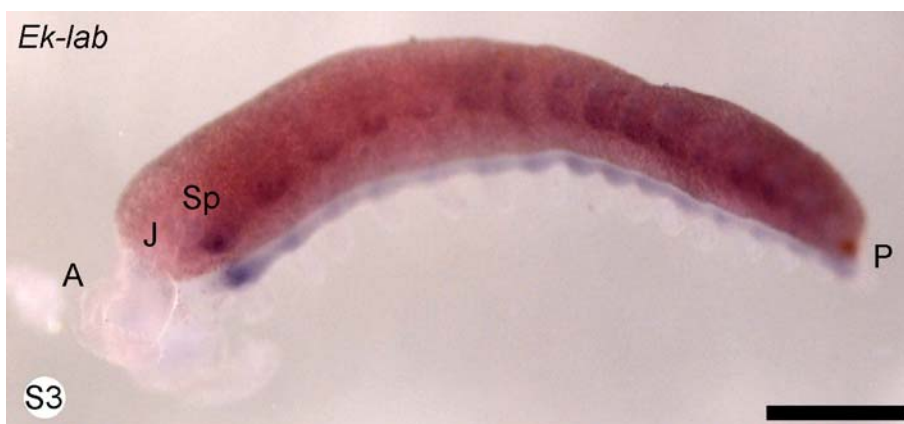

**S. 3** Whole mount of *Euperipatoides kanangrensis* embryo at stage V stained for the presence of *lab* mRNA. Lateral view, anterior is to the left. The mRNA of *lab* can be seen from the slime papilla (Sp) segment and posteriorly to the proctodeum (P). A = antenna, J = jaw, scale bar = 500  $\mu$ m.

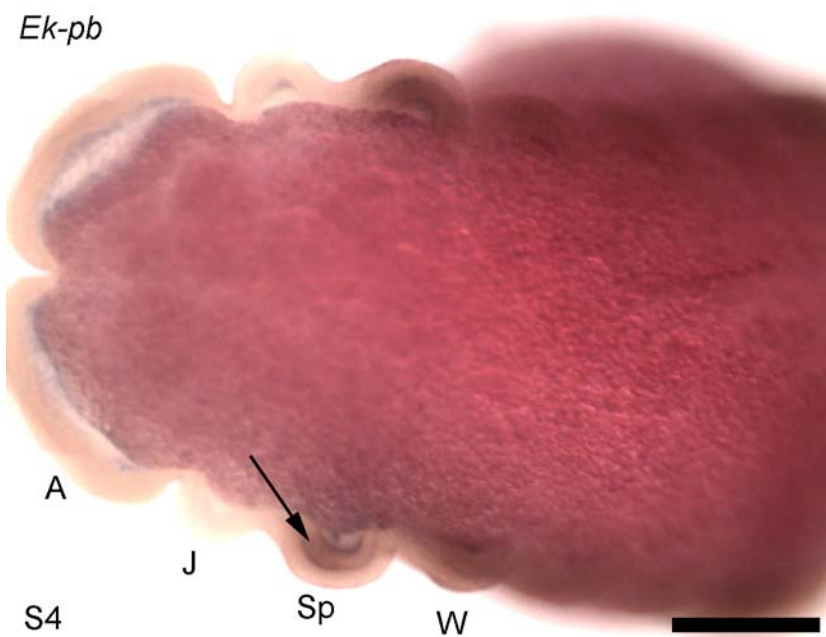

**S. 4** Whole mount of *Euperipatoides kanangrensis* embryo at stage III stained for the presence of *pb* mRNA. Dorsal view, anterior is to the left. The expression has its anterior border in the slime papilla segment (sp) and the arrow indicates its presence in the mesoderm of the limb bud. A = antenna, J = jaw, scale bar = 200  $\mu$ m.

| Chelicerates        | Oc                  | Ch   | Pp   | L1 | L2  | L3  | L4   | Op1 | Op2 | Op3 |
|---------------------|---------------------|------|------|----|-----|-----|------|-----|-----|-----|
| <i>labial</i>       |                     |      |      |    |     |     |      |     |     |     |
| <i>pb</i>           |                     |      |      |    |     |     |      |     |     |     |
| <i>Hox3</i>         |                     |      |      |    |     |     |      |     |     |     |
| <i>Dfd</i>          |                     |      |      |    |     |     |      |     |     |     |
| Myriapods*          | Oc                  | Ant  | Int  | Mn | Mx1 | Mx2 | Mxpd | L1  | L2  | L3  |
| <i>labial</i>       |                     |      |      |    |     |     |      |     |     |     |
| <i>pb</i>           |                     |      |      |    |     |     |      |     |     |     |
| <i>Hox3</i>         |                     |      |      |    |     |     |      |     |     |     |
| <i>Dfd</i>          |                     |      |      |    |     |     |      |     |     |     |
| Crustaceans         | Oc                  | Ant1 | Ant2 | Mn | Mx1 | Mx2 | T1   | T2  | T3  | T4  |
| <i>labial</i>       |                     |      |      |    |     |     |      |     |     |     |
| <i>pb</i>           |                     |      |      |    |     |     |      |     |     |     |
| <i>Hox3</i>         |                     |      |      |    |     |     |      |     |     |     |
| <i>Dfd</i>          |                     |      |      |    |     |     |      |     |     |     |
| Insects             | Oc                  | Ant  | Int  | Mn | Mx  | Lab | T1   | T2  | T3  | A1  |
| <i>labial</i>       |                     |      |      |    |     |     |      |     |     |     |
| <i>pb</i>           |                     |      |      |    |     |     |      |     |     |     |
| <i>bicoid*/zen*</i> | Anterior blastoderm |      |      |    |     |     |      |     |     |     |
| <i>Dfd</i>          |                     |      |      |    |     |     |      |     |     |     |
| Onychophora         | Ant/Oc              | Jaw  | Sp   | L1 | L2  | L3  | L4   | L5  | L6  | L7  |
| <i>labial</i>       |                     |      |      |    |     |     |      |     |     |     |
| <i>pb</i>           |                     |      |      |    |     |     |      |     |     |     |
| <i>Hox3</i>         |                     |      |      |    |     |     |      |     |     |     |
| <i>Dfd</i>          |                     |      |      |    |     |     |      |     |     |     |

**S. 5** Scheme of the expression of the anterior *Hox* genes *lab* (purple), *pb* (orange), *Hox3* (yellow) and *Dfd* (green) in relation to segment borders in different arthropod groups and onychophorans. The anterior expression borders of the four anterior *Hox* genes are conserved between onychophorans and arthropods suggesting that the head segments can be aligned from anterior to posterior, see main text. The star at Myriapods indicates that a more recent investigation in myriapods show a slightly different expression pattern, however, the anterior expression border is the same (Janssen and Damen 2006). The star at bicoid/zen indicates that these genes have gained different functions in insects. For some of the original data on the expression of *Hox* genes and other genes relevant for the question of head segmentation in arthropods see: Abzhanov A, Kaufman T C (1999); Damen et al. (1998); Haas et al. (2001); Hughes and Kaufman (2002); Jager et al. (2006); Kimm and Prpic (2006); Posnien et al. (2009); Rogers and Kaufman (1996); Rogers et al. (2002); Schmidt-Ott and Technau (1992); Schmidt-Ott et al. (1994); Telford and Thomas (1998).

### Supplementary material no. 6

The orthology assignment of the anterior *Hox* genes was based on phylogenetic analysis. The phylogenetic analyses were carried out using amino acid sequences. We compiled a *Hox* gene alignment including anterior *Hox* genes of representatives of bilaterians. The species names and their abbreviations used in phylogenetic analysis are provided in Table S 1. Sequences were aligned using the program ClustalX v.2.0.10. First the homeobox region was aligned, and then using the homeobox as anchor, the flanking regions were aligned with subsequent trimming carried out manually. Bayesian likelihood analyses were conducted using MrBayes version 3.1.1 with four simultaneous Markov chains per run and two independent runs per analysis. Chains were run for one million generations with a sampling frequency of 1000 generations and burnin of 1000. The clear classification of the *E. kanangrensis Hox* genes into

their orthology groups is apparent from phylogenetic analyses (S 6). Although our phylogenetic analysis clearly assigns the *E. kanangrensis* *Hox* genes to their paralog class with high support values, the internal grouping remains unclear.

**Table S. 1** List of the species used in phylogenetic analysis

| <b>Abbreviation</b> | <b>Species name</b>                | <b>Common name</b> | <b>phylum or class</b> |
|---------------------|------------------------------------|--------------------|------------------------|
| <i>Bfl</i>          | <i>Branchiostoma floridae</i>      | amphioxus          | Cephalochordata        |
| <i>Btu</i>          | <i>Bugula turrita</i>              | bryozoan           | Bryozoa                |
| <i>Cel</i>          | <i>Caenorhabditis elegans</i>      | nematode           | Nematoda               |
| <i>Cin</i>          | <i>Ciona intestinalis</i>          | tunicate           | Tunicata               |
| <i>Dja</i>          | <i>Dugesia japonica</i>            | flatworm           | Platyhelminthes        |
| <i>Dme</i>          | <i>Drosophila melanogaster</i>     | fruit fly          | Insecta                |
| <i>Esc</i>          | <i>Euprymna scolopes</i>           | squid              | Cephalopoda            |
| <i>Eka</i>          | <i>Euperipatoides kanangrensis</i> | velvet worm        | Onychophora            |
| <i>Fen</i>          | <i>Flaccisagitta enflata</i>       | arrow worm         | Chaetognatha           |
| <i>Lan</i>          | <i>Lingula anatina</i>             | brachiopod         | Brachiopoda            |
| <i>Lat</i>          | <i>Lithobius atkinsoni</i>         | centiped           | Myriapoda              |
| <i>Lgi</i>          | <i>Lottia gigantea</i>             | limpet             | Gastropoda             |
| <i>Lsa</i>          | <i>Lineus sanguineus</i>           | ribbon worms       | Nemertea               |
| <i>Mmu</i>          | <i>Mus musculus</i>                | house mouse        | Vertebrata             |
| <i>Ngr</i>          | <i>Nymphon gracile</i>             | sea spider         | Pycnogonida            |
| <i>Nvi</i>          | <i>Nereis virens</i>               | segmented worm     | Polychaeta             |
| <i>Pca</i>          | <i>Priapulid caudatus</i>          | Priapulid          | Priapulida             |
| <i>Pdu</i>          | <i>Platynereis dumerilii</i>       | segmented worms    | Polychaeta             |
| <i>Sca</i>          | <i>Sacculina carcini</i>           | crustacean         | Cirripedia             |
| <i>Sko</i>          | <i>Saccoglossus kowalevskii</i>    | hemichordate       | Hemichordata           |
| <i>Sro</i>          | <i>Symsagittifera roscoffensis</i> | flatworm           | Acoelomorpha           |
| <i>Tca</i>          | <i>Tribolium castaneum</i>         | beetle             | Insecta                |

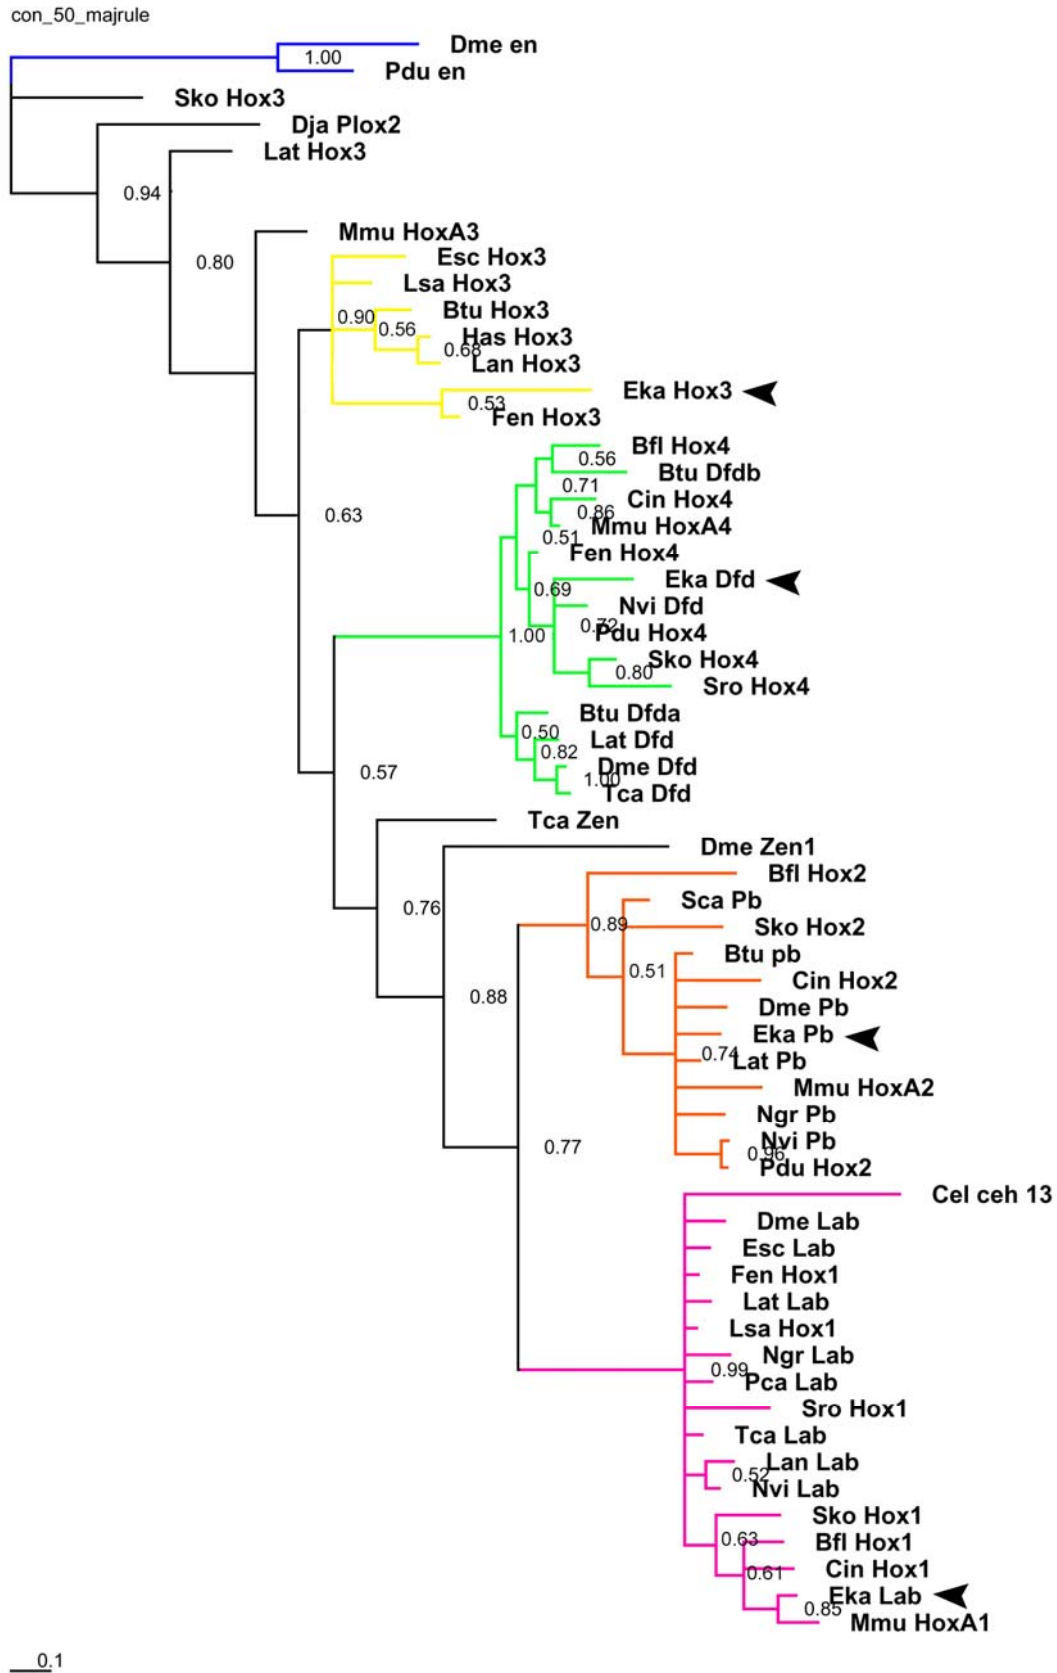

**Figure S 6** Phylogenetic reconstruction of Hox paralogs group 1 (purple), paralogs group 2 (orange), and paralogs group 3 (yellow), and paralogs group 4 (green) relationships. *Engrailed (en)* is used as outgroup (blue). Arrow heads point *E. kanangrensis* Hox sequences.

## Supplementary references

- Abzhanov A, Kaufman T C (1999) Homeotic genes and the arthropod head: Expression patterns of the *labial*, *proboscipedia*, and *Deformed* genes in crustaceans and insects. *Proc Natl Acad Sci USA* 96:10224-10229
- Haas S M, Brown S J, Beeman R W (2001a) Homeotic evidence for the appendicular origin of the labrum in *Tribolium castaneum*. *Dev Genes Evol* 211:96-102
- Hughes C L, Kaufman T C (2002) Exploring the myriapod body plan: expression patterns of the ten *Hox* genes in a centipede. *Development* 129:1225-1228
- Jager M, Murienne J, Clabaut C, Deutsch J, Le Guyader H, Manuel M (2006) Homology of arthropod anterior appendages revealed by *Hox* gene expression in a sea spider. *Nature* 441:506-508
- Rogers B T, Kaufman T C (1996) Structure of the insect head as revealed by EN protein pattern in developing embryos. *Development* 122:3419-3432
- Rogers B T, Peterson M D, Kaufman T C (2002) The development and evolution of insect mouthparts as revealed by the expression patterns of gnathocephalic genes. *Evol Dev* 4:96-110
- Schmidt-Ott U, Technau G M (1992) Expression of *en* and *wg* in the embryonic head and brain of *Drosophila* indicates a refolded band of seven segment remnants. *Development* 116:111-125
- Schmidt-Ott U, Gonzáles-Gaitán M, Jäckle H, Technau G M (1994) Number, identity, and sequence of the *Drosophila* head segments as revealed by neural elements and their deletion patterns in mutants. *Proc Natl Acad Sci USA* 91:8363-8367
